# Supplementary material for: Enriching 2D transition metal borides via MB XMenes (M = Fe, Co, Ir): Strong correlation and magnetism
Source: Royal Society of Chemistry journal article supplement (doi:10.1039/d3nh00364g), 2023-11-14
Supplement: d3nh00364g1.pdf [file d3nh00364g1.pdf]

## Enriching the 2D transition metal borides via MB XMenes (M=Fe, Co, Ir): Strong correlation and magnetism

Jiawei Tang<sup>a//</sup>, Shaohan Li<sup>b,c//</sup>, Duo Wang<sup>d//</sup>, Qi Zheng<sup>b,c</sup>, Jing Zhang<sup>a</sup>, Tao Lu<sup>b,c</sup>, Jin Yu<sup>b,c</sup>, Litao Sun<sup>a\*</sup>, Baisheng Sa<sup>e</sup>, Bobby G. Sumpter<sup>f</sup>, Jingsong Huang<sup>f</sup>, Weiwei Sun<sup>a,c,g\*</sup>

*a. SEU-FEI Nano-Pico Center, Key Laboratory of MEMS of Ministry of Education, School of Electronic Science and Engineering, Southeast University, Nanjing, 210096, China*

*b. School of Materials Science and Engineering, Southeast University, Nanjing, 211189, China*

*c. Jiangsu Province Key Laboratory of Advanced Metallic Materials, Southeast University, Nanjing, 219210, China*

*d. Faculty of Applied Sciences, Macao Polytechnic University, Macao, SAR, China*

*e. Multiscale Computational Materials Facility, and Key Laboratory of Eco-Materials Advanced Technology, College of Materials Science and Engineering, Fuzhou University, Fuzhou 350100, China*

*f. Center for Nanophase Materials Sciences, Oak Ridge National Laboratory, Oak Ridge, Tennessee, 37831, United States*

*g. Key Laboratory of Quantum Materials and Devices of Ministry of Education, School of Physics, Southeast University, Nanjing, 211189, China*

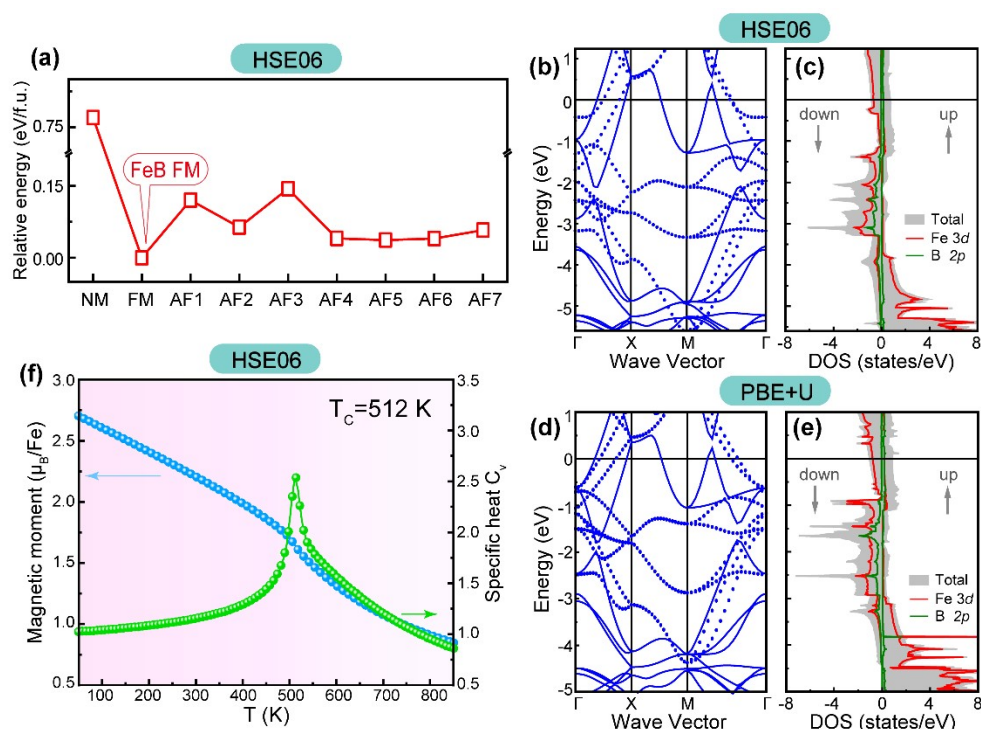

Fig. S1 (a) Relative energies (in eV/f.u.) of the non-magnetic and eight collinear magnetic FeB configurations obtained from the HSE06 functional. (b-e) Calculated band structure, total and projected density of states for FeB monolayer in its magnetic ground state by employing (b, c) HSE06 and (d, e) PBE+U function,

respectively. The blue solid and dotted line representing the spin-up and spin-down states. The Fermi level is set to zero. (f) The magnetic moment and specific heat  $C_v$  of FM-FeB XMene as a function of temperature calculated by HSE06 functional.

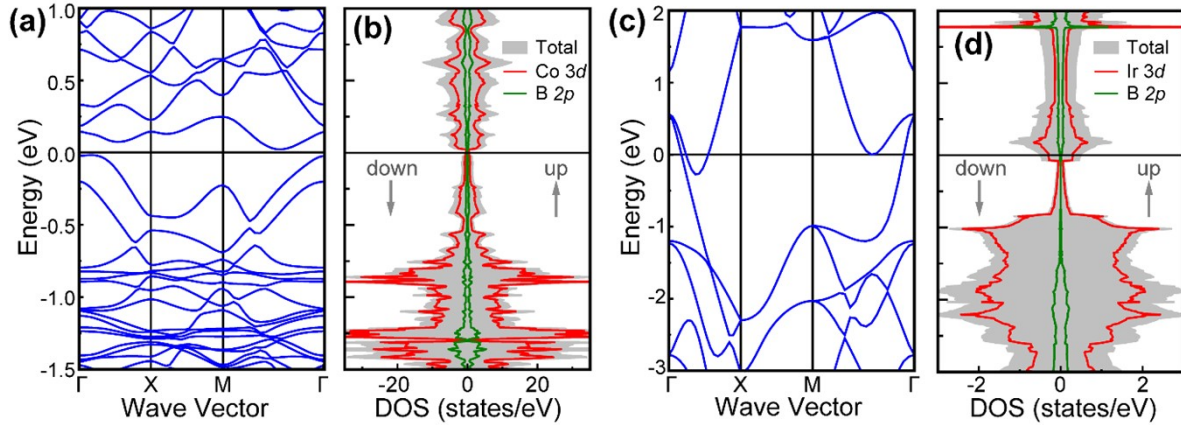

Fig. S2 Calculated band structure, total and projected density of states for (a, b) CoB and (c, d) IrB monolayers in their magnetic ground state (respectively AF4 and NM). The Fermi level is set to zero.

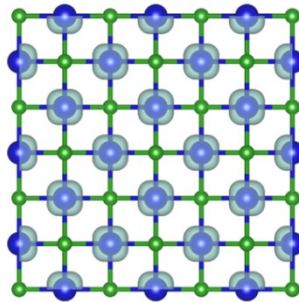

Fig. S3 The spatial distributions of spin densities with an isosurface of  $0.03 \text{ e}/\text{\AA}^3$  for the FM-FeB monolayer.

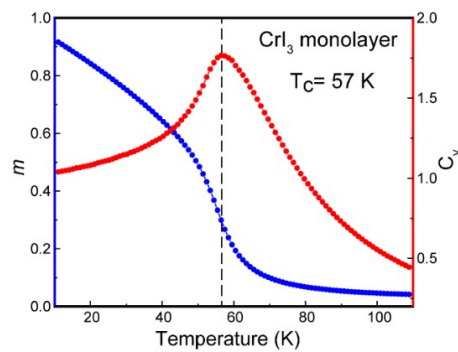

Fig. S4 The normalized magnetization and specific heat as a function of temperature for the  $\text{CrI}_3$  monolayer.

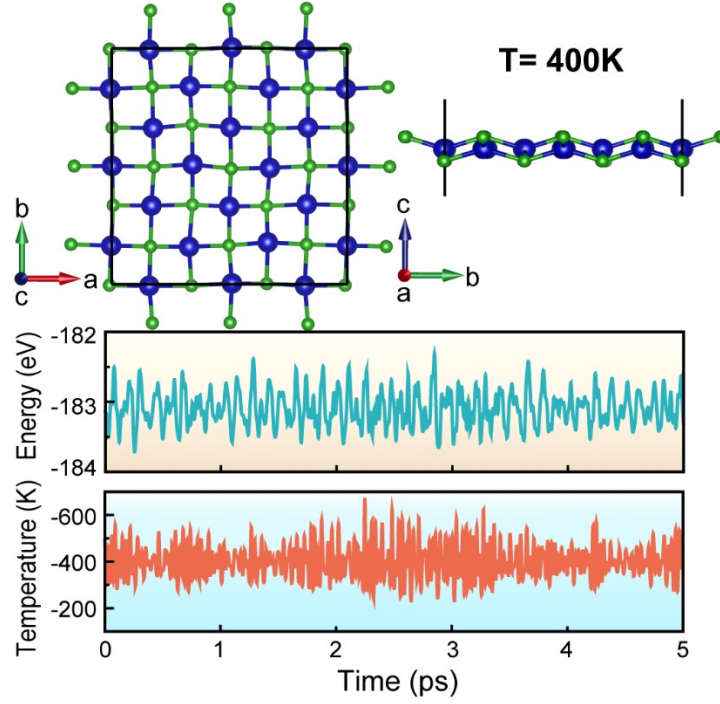

Fig. S5 The final structure and the evolution of energy (eV) and corresponding temperature (K) during the 5 ps AIMD at 400 K for the 2D FeB monolayer with FM configuration.

Table S1 Calculated lattice constants  $a$  (Å), M-B bond lengths  $l$  (Å), layer thickness  $h$  (Å), and the magnetic moment projected on Fe atom  $M_{\text{Fe}}$  ( $\mu_B/\text{Fe}$ ) of FeB monolayer under PBE+U and HSE06 functionals.

|                 | $U_{\text{eff}}=1$ | $U_{\text{eff}}=2$ | $U_{\text{eff}}=3$ | $U_{\text{eff}}=3.96$ | $U_{\text{eff}}=5$ | HSE06       |
|-----------------|--------------------|--------------------|--------------------|-----------------------|--------------------|-------------|
| $a$             | 3.71               | 3.76               | 3.74               | <b>3.86</b>           | 4.04               | <b>3.82</b> |
| $l$             | 1.93               | 1.92               | 1.94               | <b>2.02</b>           | 2.02               | <b>2.00</b> |
| $h$             | 1.14               | 0.97               | 1.11               | <b>1.20</b>           | 0                  | <b>1.19</b> |
| $M_{\text{Fe}}$ | 1.40               | 1.51               | 1.59               | <b>2.42</b>           | 2.99               | <b>2.31</b> |
